# Supplementary material for: Rewiring Lipid Metabolism by Targeting PCSK9 and HMGCR to Treat Liver Cancer
Source: MDPI journal article supplement (doi:10.3390/cancers15010003), 2022-12-20
Supplement: s1 [file s1]

# Opti-Protein Ultra Marker

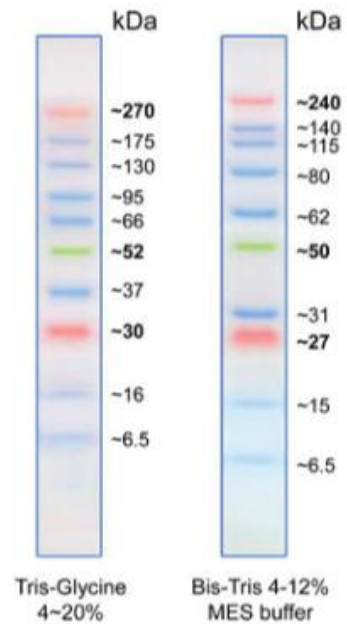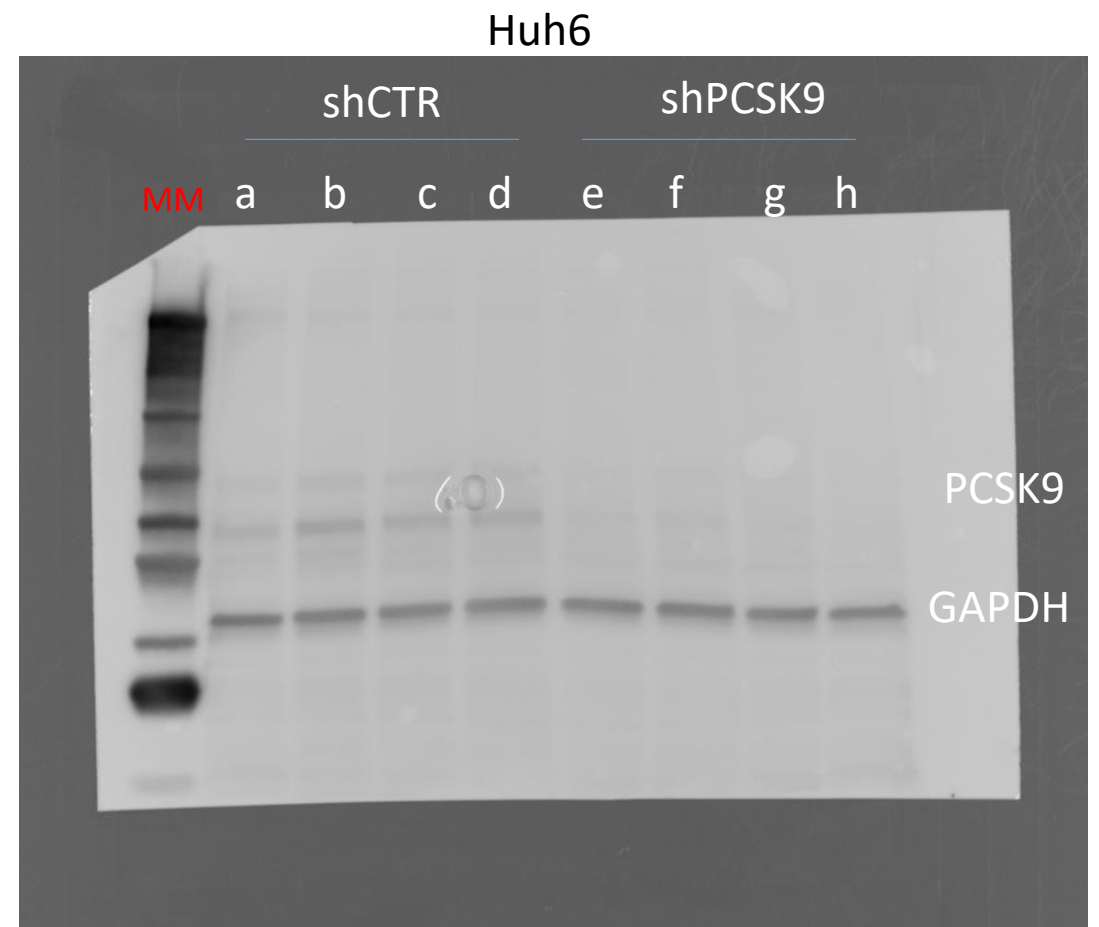

MM: molecular marker

a: Huh6 shCTR MOI 1

b: Huh6 shCTR MOI 3

c: Huh6 shCTR MOI 5

d: Huh6 shCTR MOI 10

e: Huh6 shPCSK9 MOI 1

f: Huh6 shPCSK9 MOI 3

g: Huh6 shPCSK9 MOI 5

h: Huh6 shPCSK9 MOI 10

## Huh7

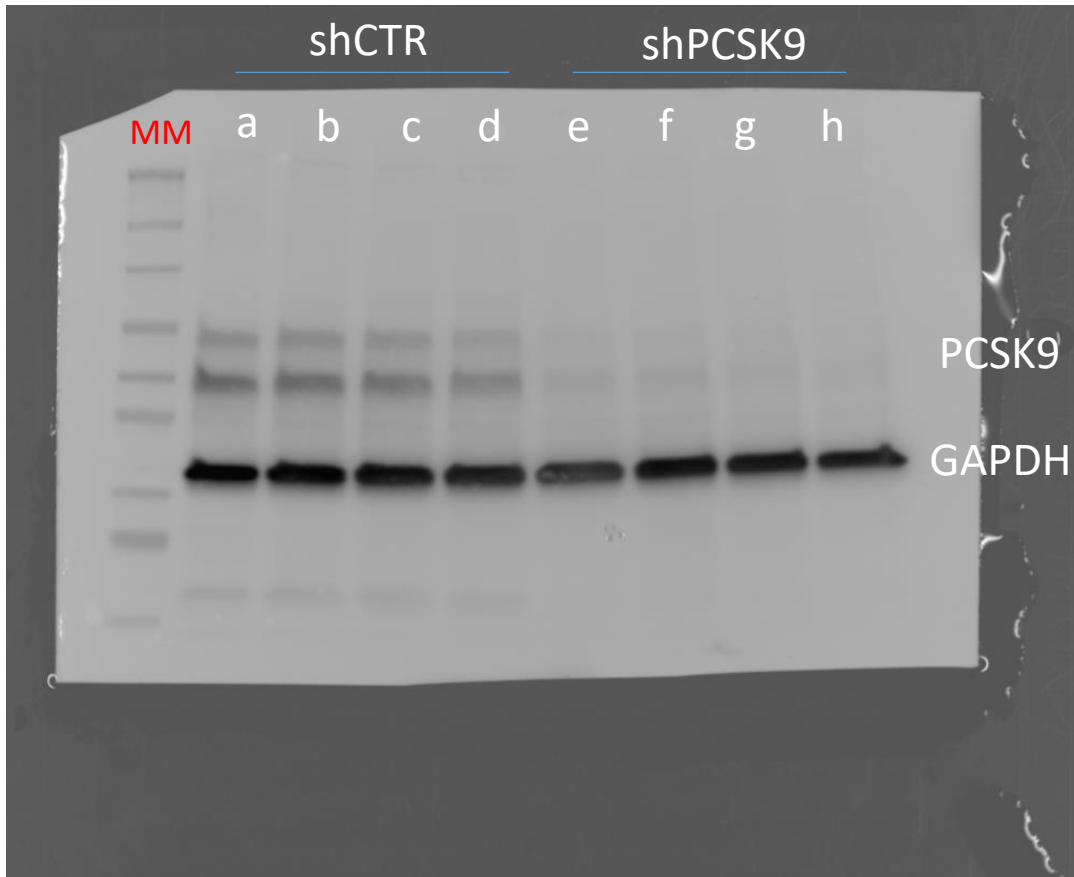

MM: molecular marker

a: Huh7 shCTR MOI 1

b: Huh7 shCTR MOI 3

c: Huh7 shCTR MOI 5

d: Huh7 shCTR MOI 10

e: Huh7 shPCSK9 MOI 1

f: Huh7 shPCSK9 MOI 3

g: Huh7 shPCSK9 MOI 5

h: Huh7 shPCSK9 MOI 10

## HepG2

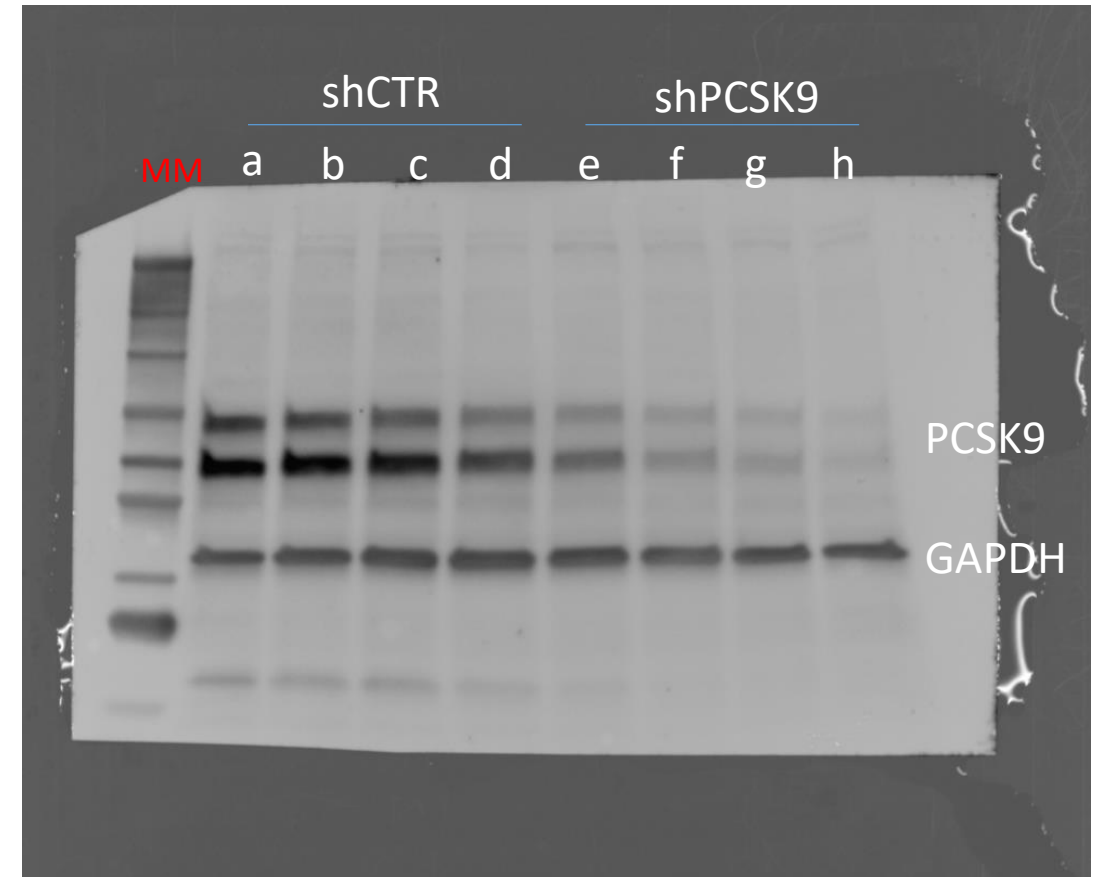

MM: molecular marker

a: HepG2 shCTR MOI 1

b: HepG2 shCTR MOI 3

c: HepG2 shCTR MOI 5

d: HepG2 shCTR MOI 10

e: HepG2 shPCSK9 MOI 1

f: HepG2 shPCSK9 MOI 3

g: HepG2 shPCSK9 MOI 5

h: HepG2 shPCSK9 MOI 10

# Huh6

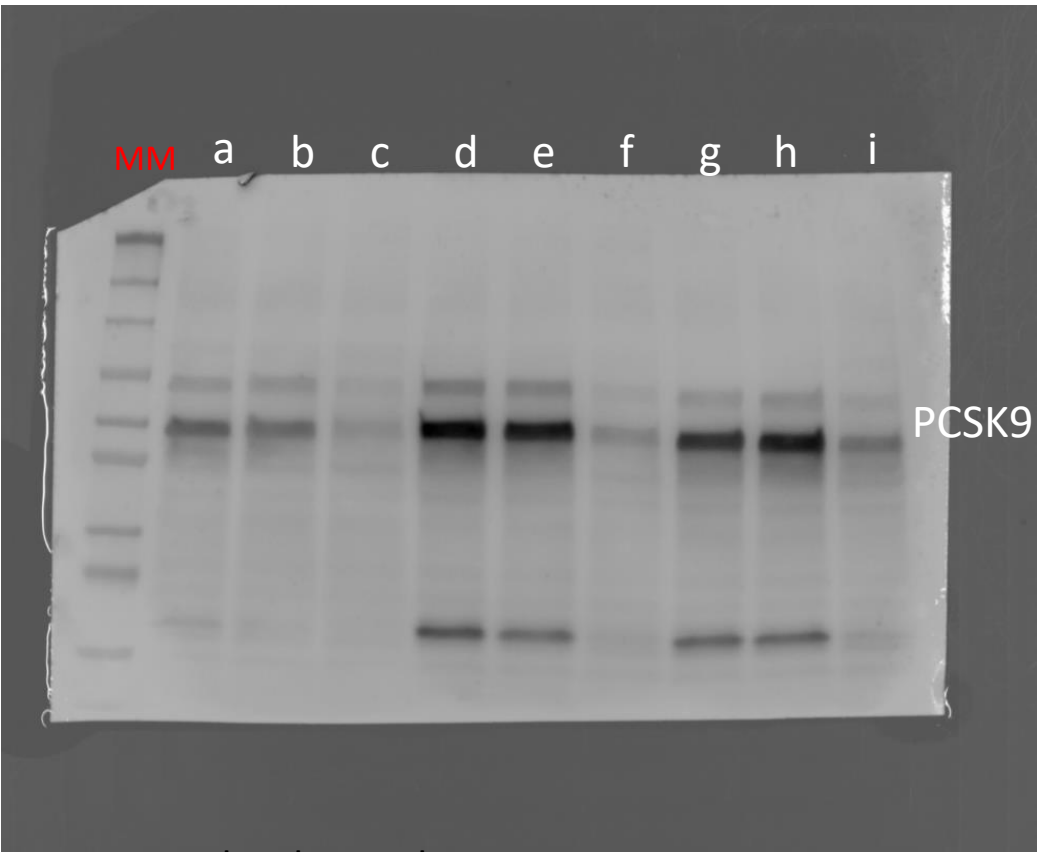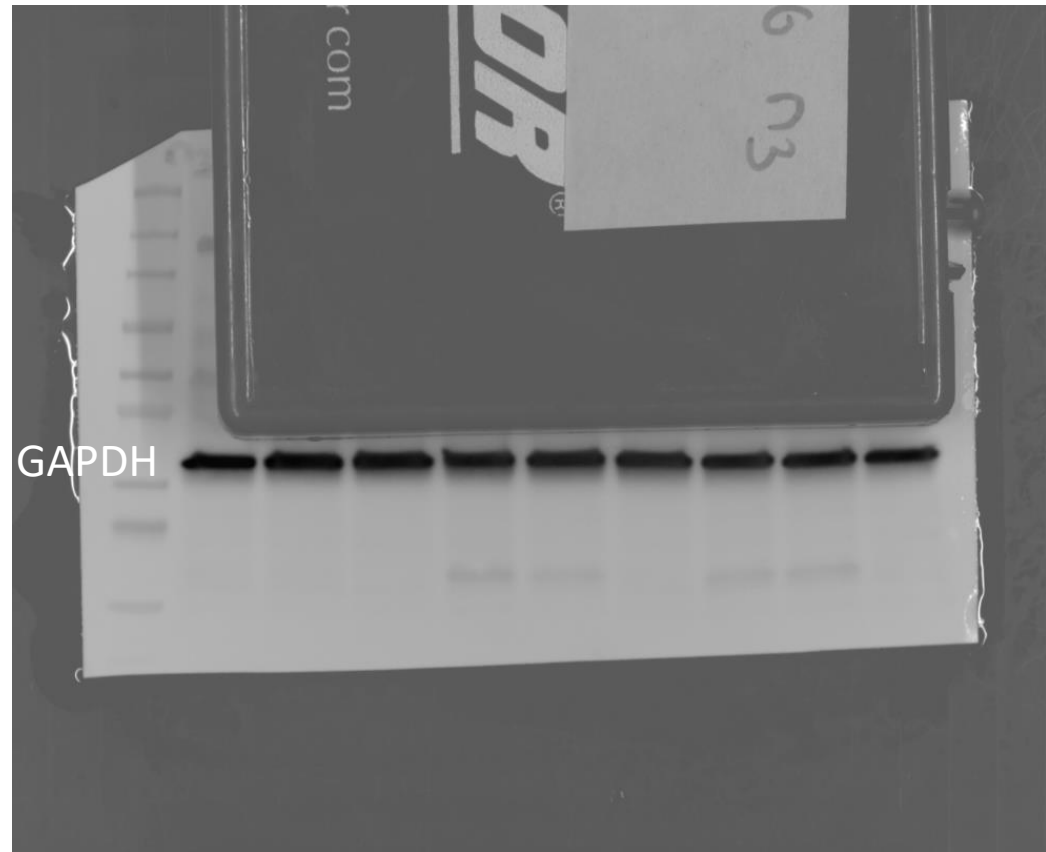

MM: molecular marker

a: Huh6 Non-treated (NT) 24hr

b: Huh6 DMSO 10 (D10) 24hr

c: Huh6 R-IMPP 10 (R10) 24hr

d: Huh6 Non-treated (NT) 48hr

e: Huh6 DMSO 10 (D10) 48hr

f: Huh6 R-IMPP 10 (R10) 48hr

g: Huh6 Non-treated (NT) 72hr

h: Huh6 DMSO 10 (D10) 72hr

i: Huh6 R-IMPP 10 (R10) 72hr

# Huh7

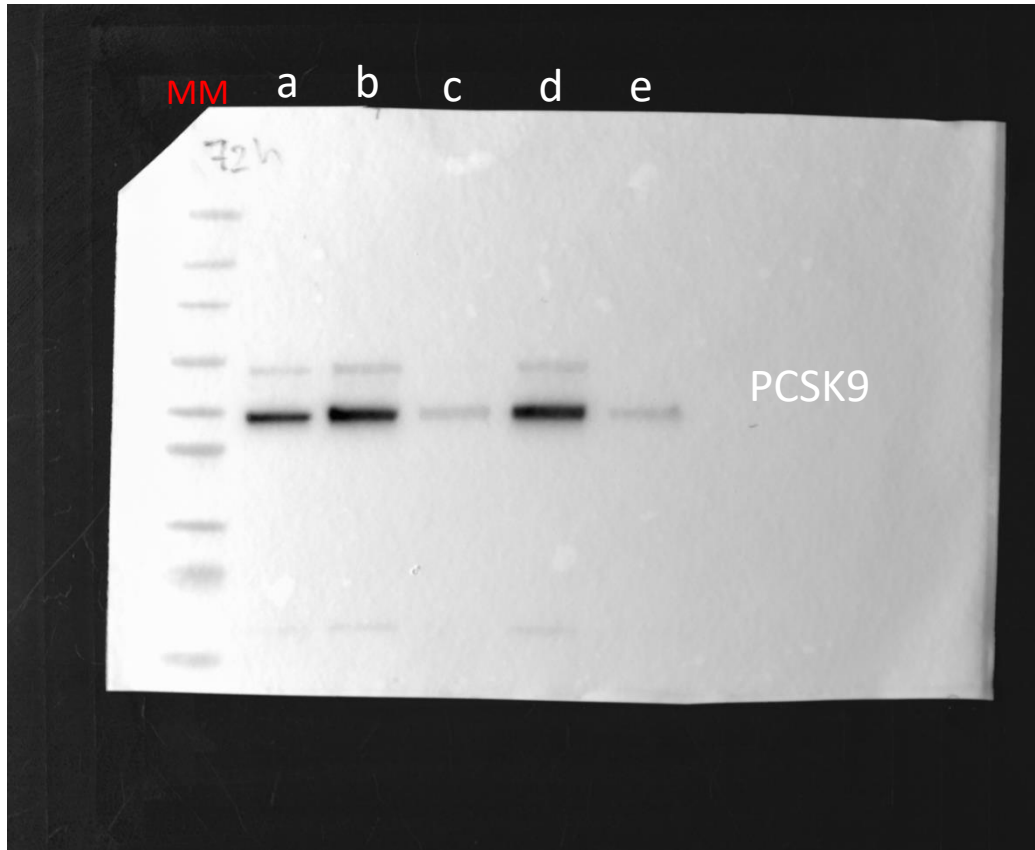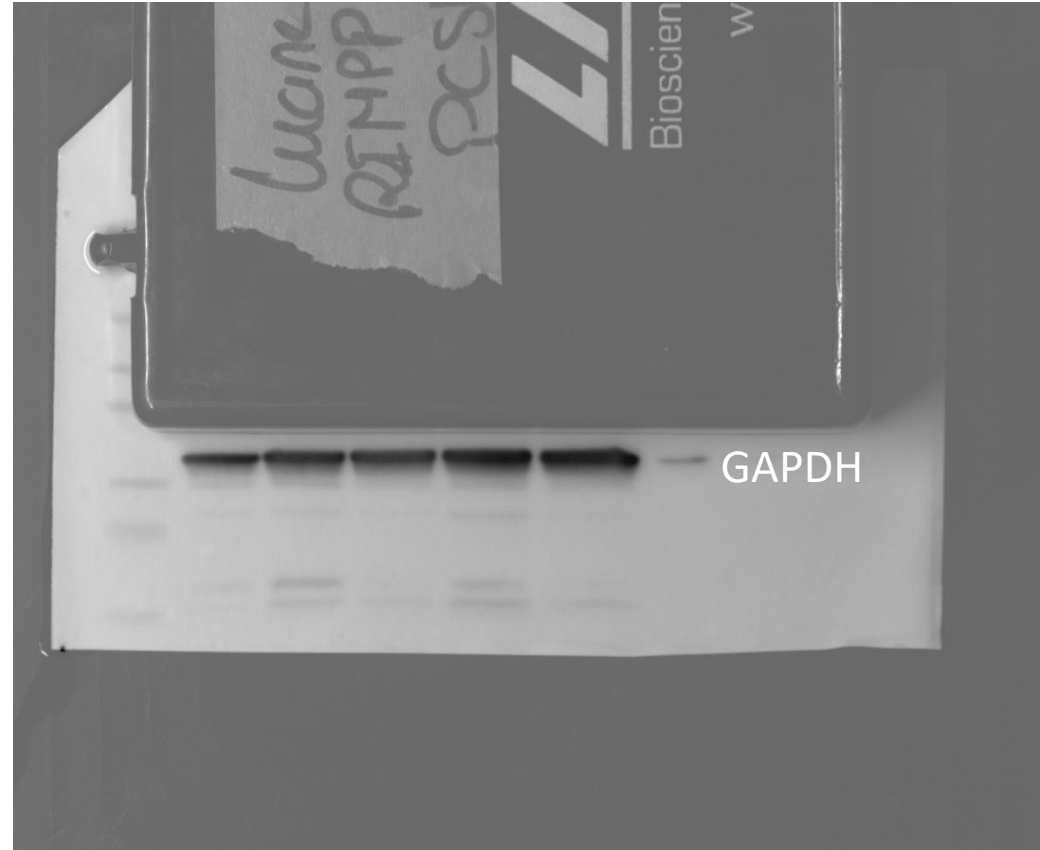

MM: molecular marker

a: Huh7 Non-treated (NT) 72hr

b: Huh7 DMSO 10 (D10) 72hr

c: Huh7 R-IMPP 10 (R10) 72hr

d: Huh7 DMSO 30 (D30) 72hr

e: Huh7 R-IMPP 30 (R30) 72hr

# HepG2

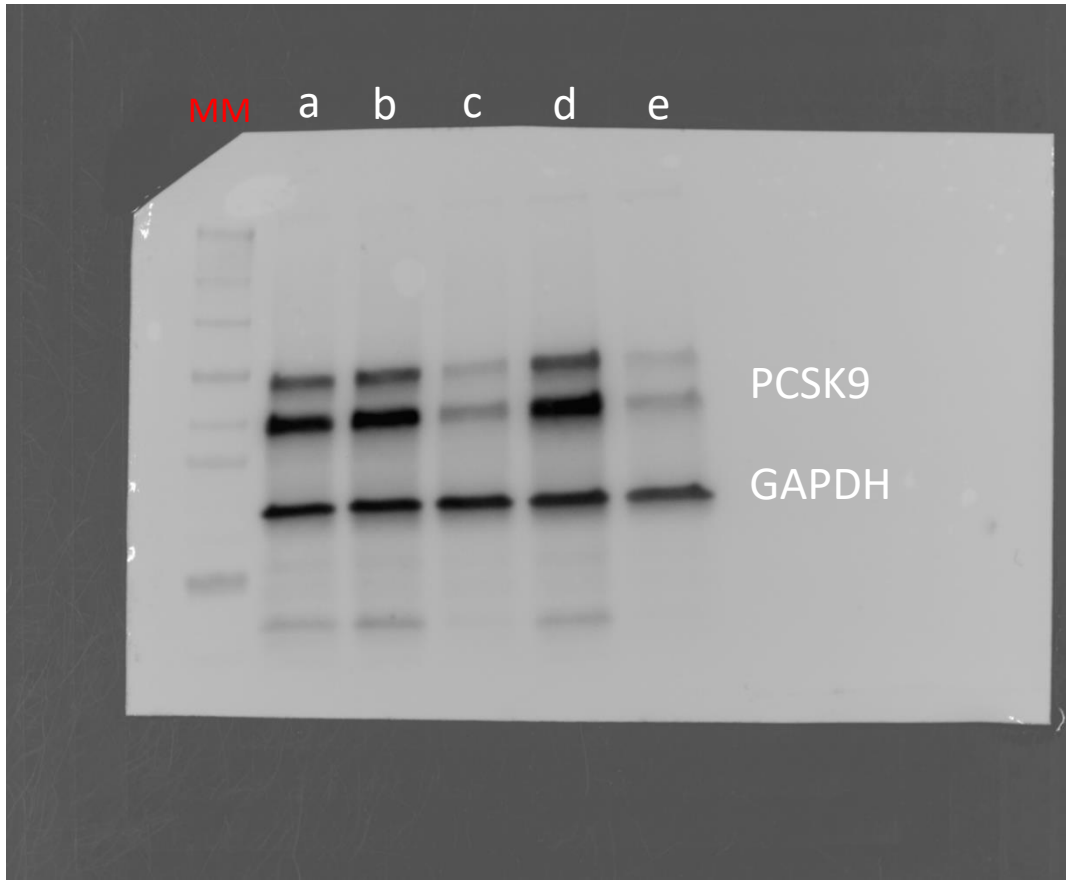

MM: molecular marker

a: HepG2 Non-treated (NT) 72hr

b: HepG2 DMSO 10 (D10) 72hr

c: HepG2 R-IMPP 10 (R10) 72hr

d: HepG2 DMSO 30 (D30) 72hr

e: HepG2 R-IMPP 30 (R30) 72hr
